# Supplementary material for: Sevoflurane postconditioning attenuates cardiomyocyte hypoxia/reoxygenation injury via restoring mitochondrial morphology
Source: PeerJ. 2016 Nov 3;4:e2659. doi: 10.7717/peerj.2659 (PMC5101611; doi:10.7717/peerj.2659)
Supplement: Supplemental Information 1 — Raw data for LDH level, cell death, cell viability, mitochondrial morphology analysis, mitochondrial membrane potential measurement, detection of mPTP opening, and related protein expression result. [file peerj-04-2659-s001.xlsx]

## Sheet: Sheet1
LDH
CON	H/R	SPostC
112.33	198.45	226.37
157.54	321.11	175.62
180.82	279.33	222.36
211.32	289.41	215.65
125.21	245	189.21
167.01	295.67	256.78
TUNEL
CON	H/R	SPostC
8.34	28.39	12.86
4.09	67.8	18.82
5.89	43.33	13.22
11.03	45.1	12.96
8.4	38.89	15.67
4.24	36.11	18.24
2.39	40.91	30.61
8.46	75	31.72
8.79	64.53	51.44
4.23	33.72	45.4
8.34	28.39	12.86
19.09	67.8	8.82
9.89	33.33	13.22
6.03	45.1	12.96
8.4	38.89	8.67
12.24	66.11	18.24
4.39	40.91	30.61
8.46	75	31.72
3.79	64.53	51.44
3.23	33.72	45.4
8.34	48.39	32.86
19.09	67.8	13.82
2.89	33.33	26.22
11.03	45.1	12.96
8.4	38.89	9.67
2.24	56.11	18.24
12.39	40.91	30.61
8.46	45	31.72
5.79	64.53	51.44
3.23	33.72	45.4
Trypan
CON	H/R	SPostC
93.99	81.61	87.14
96.98	32.2	91.18
98.45	66.67	86.78
96.356	54.9	87.04
99.52	61.11	91.33
95.34	63.89	81.76
98.46	59.09	69.39
75.22	25	58.28
98.01	35.47	48.56
87.85	66.28	54.6
94.99	81.61	87.14
72.98	32.2	91.18
68.45	66.67	86.78
93.77	54.9	87.04
98.52	61.11	91.33
95.34	63.89	81.76
93.46	59.09	69.39
98.22	25	58.28
78.01	35.47	48.56
96.85	66.28	54.6
97.99	81.61	87.14
94.98	32.2	91.18
88.45	66.67	86.78
99.77	54.9	87.04
89.52	61.11	91.33
98.34	63.89	81.76
97.46	59.09	69.39
94.22	25	58.28
75.01	35.47	48.56
97.85	66.28	54.6
Mean area/perimeter ratio
CON	H/R	SPostC
4.8059	1.7855	3.2102
4.5422	1.4611	2.8436
2.471	2.0626	3.0097
3.8704	1.8132	3.3342
3.5422	3.4879	2.8506
3.306	3.0433	3.6322
5.3488	2.9052	4.8059
2.582	2.9779	4.5422
3.5609	2.8185	2.471
3.7621	2.5975	3.5704
3.25102	2.1005	3.5422
2.8436	2.4787	3.306
3.0097	2.5272	5.3488
3.5342	2.8592	2.582
2.8506	2.0127	3.6609
3.9322	2.1014	3.7621
4.8059	2.6811	3.1057
4.5422	2.6495	3.2033
2.471	3.0905	2.0285
3.5704	2.0283	3.67
3.903	2.8262	4.3567
2.8436	2.9172	2.7444
3.0097	2.9172	4.48786
2.8342	3.3436	2.83243
3.8506	3.5104	2.73343
3.6322	2.2853	4.26422
4.7059	4.3353	3.45677
3.9172	3.5028	4.2197
2.9172	2.7886	2.65466
3.8798	2.686	3.40257
Inverse circularity
CON	H/R	SPostC
11.2994	5.66098	9.81354
10.8912	9.33707	0.90465
8.39631	7.54717	10.02
9.02527	6.6432	9.85222
10.1743	6.2383	7.26216
7.92857	7.63942	7.38422
8.34724	5.20345	7.12251
8.57633	8.17335	9.28505
8.78735	6.2199	7.72201
10.7182	5.97666	8.60585
7.73994	7.78816	8.4246
11.4416	5.66572	9.53741
7.82613	7.24638	8.29876
7.57633	7.47384	8.22368
7.71605	8.21751	9.943
8.09565	5.976	6.45
11.4343	7.33138	7.02004
7.64363	8.157	9.87167
9.9562	6.019	7.97448
8.15657	8.2033	7.97448
10.2324	6.26568	7.55287
10.9967	5.96555	7.95545
7.22555	8.01234	8.41043
8.0654	8.057	8.09061
7.99886	8.03441	8.84956
7.73645	6.33256	8.05802
7.35366	7.32446	9.954
10.4334	7.22368	6.448
10.3454	7.58725	9.79432
10.0455	7.08855	9.21659
Membrane potential
CON	H/R	SPostC
0.949445	0.620752	0.892639
0.939454	0.609396	0.720495
1.04313	0.621776	0.817165
1.0883	0.584885	0.786678
0.949445	0.579932	0.683177
0.939454	0.469684	0.8411
1.04313	0.620752	0.892639
1.0883	0.616396	0.720495
1.08283	0.584885	0.817165
1.08283	0.621776	0.786678
0.949445	0.579932	0.683177
0.939454	0.449684	0.8411
0.897353	0.620752	0.892639
1.08283	0.621776	0.720495
1.04313	0.584885	0.817165
1.0883	0.579932	0.786678
0.897353	0.489684	0.683177
0.897353	0.6368	0.8411
1.0816	0.55	0.867
0.9198	0.59976	0.713222
MPTP
CON	H/R	SPostC
0.859996	0.182673	0.467375
1.48395	0.103173	0.374708
1.36687	0.160921	0.255709
1.4893	0.138226	0.463435
1.671	0.154052	0.428887
0.836392	0.123982	0.471112
1.3501	0.115126	0.237526
1.31953	0.0680185	0.400871
0.849895	0.12213	0.234933
1.34178	0.152503	0.252544
0.723185	0.0985932	0.312649
1.39852	0.0852252	0.314737
0.391982	0.0609473	0.236617
0.781708	0.106271	0.568662
0.720828	0.114891	0.391982
0.379792	0.0961351	0.387571
0.784738	0.12607	0.440066
0.539198	0.132703	0.261097
0.590684	0.199072	0.452458
1.12055	0.0830364	0.628666
Mfn2-IF
CON	H/R	SPostC
0.913579	0.602875	0.718026
0.71124	0.518405	0.818862
0.902109	0.633659	0.788647
1.3776	0.509367	0.827375
1.01149	0.515601	0.666017
1.10738	0.65629	0.721806
1.10747	0.456769	0.935833
0.913579	0.515463	0.837332
0.71124	0.535241	0.741155
0.915717	0.515601	0.924501
1.3776	0.65629	0.804865
1.01149	0.602875	0.838442
1.10738	0.558405	1.36121
1.10747	0.533659	0.850814
0.827646	0.519367	0.83707
1.01063	0.506864	0.837332
0.902109	0.515463	0.858862
1.01061	0.50003	0.798647
1.01062	0.512841	0.827375
1.02182	0.525241	0.666017
0.967292	0.514688	0.721806
1.09867	0.495696	0.835833
1.01061	0.523306	0.724501
1.01062	0.503525	0.764865
1.02182	0.514688	0.888442
0.967292	0.515696	1.06121
1.09867	0.573306	0.850814
0.827646	0.612525	0.83707
1.01063	0.50403	0.718026
0.915717	0.558411	0.741155
Drp1-IF
CON	H/R	SPostC
1.18719	0.966114	0.964771
0.998955	1.12405	0.897
0.957606	1.13748	0.990745
0.97119	1.17779	0.874907
0.919839	1.16599	1.13435
1.07942	0.966114	1.16958
0.902821	1.12405	1.07165
0.964771	1.13748	0.917301
1.103	1.17779	0.915808
1.10315	1.16599	0.888192
0.923421	0.966114	0.912375
1.05822	1.12405	1.10733
0.902224	1.13748	0.87625
0.879236	1.17779	0.896104
0.900731	1.16599	0.895656
0.940737	1.17779	0.903269
0.903872	1.16599	0.865652
0.937306	0.966114	1.00224
1.24541	1.12405	0.939543
1.07942	1.15748	1.10882
0.902821	1.18779	1.03224
0.954771	1.13748	0.946708
1.103	1.17779	1.05225
1.01315	1.16599	1.02642
0.913421	1.13779	0.940808
1.08822	1.16599	0.988192
0.902224	0.906114	0.912375
0.879236	0.966114	1.15733
1.33523	1.12405	0.87625
0.985474	1.14748	0.9745
FIS1-IF
CON	H/R	SPostC
1.0592	1.20294	1.07392
1.06347	0.994159	1.24219
1.07941	1.21572	1.33098
1.04357	1.26176	1.21639
0.941901	1.05882	1.06962
0.972371	1.04509	1.26653
0.93827	1.04784	1.03467
1.00679	1.02431	1.11083
0.993369	1.27793	1.02899
1.00679	1.02431	1.32956
0.993369	1.27793	1.29381
0.9018	1.03499	1.07392
1.07941	1.01572	1.34218
1.04357	1.26176	1.13098
0.941901	1.35882	1.31639
0.972371	1.14509	1.06962
0.93827	1.04784	1.36653
1.06347	0.994159	1.03467
0.993369	1.27793	1.28508
0.9018	1.13499	1.32899
1.0592	1.10294	1.12956
0.9018	1.03499	1.27392
1.0592	1.00294	1.04218
1.06347	0.994159	1.23098
1.07941	1.01572	1.21639
1.04357	1.36176	1.16962
0.941901	1.25883	0.96653
0.972371	1.04509	1.33467
0.93827	0.947837	1.01083
1.00679	1.02431	1.12899
Mfn1-IF
CON	H/R	SPostC
0.874461	0.697584	0.774087
1.24605	0.587762	0.758269
1.06601	0.552597	0.831521
0.92321	0.727584	0.69797
0.919183	0.637762	0.762151
0.999137	0.75025	0.6922
0.938596	0.593	0.662
1.03379	0.7906	0.6035
0.937596	0.693	0.662
1.03379	0.7826	0.6035
0.874461	0.697584	0.774087
0.92321	0.723584	0.59797
0.919183	0.633762	0.752151
0.999137	0.75025	0.6922
1.24605	0.587762	0.848269
1.01601	0.552597	0.801521
0.92321	0.724584	0.69797
0.969183	0.627762	0.862151
0.998137	0.74025	0.6622
0.935596	0.59	0.652
1.03279	0.7746	0.6035
0.919183	0.627762	0.762151
0.999137	0.75025	0.5922
0.871461	0.697584	0.744087
1.24504	0.584762	0.758269
1.065	0.551597	0.821521
0.874461	0.697584	0.764087
1.24504	0.587762	0.738269
1.065	0.552597	0.831521
0.92121	0.727584	0.67797
Opa1-IF
CON	H/R	SPostC
0.9	0.5333	0.7
0.7	0.6	0.8
0.9	0.6143	0.635
1.4	0.712	0.8
1	0.42	0.7
0.9	0.489	0.567
1	0.5687	0.576
1	0.4897	1.4
0.9	0.489	0.8
1.1	0.7315	0.8
1.1	0.4987	0.7
1.1	0.65	0.9
0.8	0.5126	0.8
0.9	0.6143	0.635
1.4	0.712	0.8
1	0.67	0.6
1	0.39	0.599
1	0.4897	1.4
0.9	0.489	0.8
1.1	0.7315	0.8
1	0.67	0.6
1.1	0.4987	0.7
1.1	0.65	0.9
0.8	0.5126	0.8
1	0.42	0.7
0.9	0.489	0.567
1	0.5687	0.576
1	0.39	0.599
0.9	0.5333	0.7
0.7	0.6	0.8
Mfn1-WB
CON	H/R	SPostC
0.8	0.76	0.72
1	0.82	0.59
1.2	0.67	0.56
1.1	0.52	0.67
0.9	0.4	0.55
Mfn2-WB
CON	H/R	SPostC
1.06	0.42	0.78
0.97	0.56	0.86
1.1	0.44	0.79
0.91345	0.32	0.934
1.095	0.35	0.85
Opa1-WB
CON	H/R	SPostC
1.095	0.37	0.88
1.1	0.57	1.14
0.9	0.55	0.89
0.95	0.4	0.7912
1	0.51	0.85
Drp1-WB
CON	H/R	SPostC
1.03	1.98	1.21
1.1	1.75	1.12
0.98	2.19	1.66
1.1	1.81	1.36
0.9	2.25	1.26
FIS1-WB
CON	H/R	SPostC
1.15	1.78	2.4
0.85	1.74	1.79
1.1	1.89	2.18
0.95	2.63	3.11
1.07	1.76	1.56
0.99	1.2	1.52
